# Supplementary material for: The self-assembly and patterning of thin polymer films on pyroelectric substrates driven by electrohydrodynamic instability
Source: Royal Society of Chemistry journal article supplement (doi:10.1039/c1sm06434g), 2011-11-11
Supplement: c1sm06434g.pdf [file c1sm06434g.pdf]

Electronic Supplementary Information (ESI) available:

#### Experimental

All materials and chemicals were purchased commercially and used as received. LiNbO<sub>3</sub> (LN) was purchased from Deqingruiyang Optical Element Co., Ltd (Zhejiang, China) and was made by electric-field-pulling (Czochralski) method. PMMA, F8BT, and MEH-PPV were purchased from Sigma-Aldrich. PS was purchased from Polymer source, Inc. Other chemical reagents were purchased from Sinopharm Chemical Reagent Beijing Co. All the AFM images were recorded using a Veeco D3100 instrument and the SEM images were recorded with a JEOL 7401 microscope. Optical and Fluorescent images were recorded with a Nikon TE2000-U optical microscope.

*Patterning of charge on LN:* Uniformly polarized LN crystal (Z-cut) was contacted with a topographically patterned PDMS stamp (previously heated at 180 °C in order to adsorb and transfer heat) for 1s to accomplish the pyroelectricity and the procedure is similar as in literature [24].

*Adsorption of nanoparticles:* Charged LN was immersed into a 0.5% w/v suspension of polystyrene microspheres (60 nm) in ethanol for 60 seconds and quickly rinsed with water to remove the loosed attached part, and the results were recorded with SEM.

*Self-assembly of polymer film on LN:* Different types of polymers were used : 1) polystyrene (PS) (Mw=27kg mol<sup>-1</sup>) 2) poly(methyl methacrylate) (PMMA) (molecular weight Mw =350 kg mol<sup>-1</sup>) 3) Polyvinyl Alcohol (PVA) (molecular weight Mw = 1750±50 g mol<sup>-1</sup>) 4) 1%wt Poly[(9,9-di-n-octylfluorenyl-2,7-diyl)-alt-(benzo[2,1,3] thiadiazol-4,8-diyl)] (F8BT) (molecular weight Mw = 5000-8000 g mol<sup>-1</sup>) doped in PS 5) 1% wt Poly[2-methoxy-5-(2-ethylhexyloxy)- 1,4-phenylenevinylene] (molecular weight Mw =51000 g mol<sup>-1</sup>) doped in PS. Films with thicknesses of 30-60 nm were spin-coated from 1wt% solution (PS in toluene, PMMA in chlorobenzene, PVA in water, F8BT mixed PS in xylene, and MEH-PPV mixed PS in toluene) onto LN. The surface of LN wafer was treated by air plasma (PDC-32G Plasma Cleaner, Harrick Plasma, NY) using medium level for 2 min before spin-coating PVA film.

The assembly in room temperature was taken in airtight chamber with saturated solvent vapor (F8BT mixed PS in xylene, MEH-PPV mixed PS in toluene) for 1-2h, and then dried in air for 1h.

The assembly above glass transition temperature of the polymer was taken at the temperature of 140 °C, 170 °C and 90 °C for PS, PMMA and PVA respectively. After annealing, the samples were quenched to room temperature quickly. And the spin-coated progress was taken after cleaning the surface of discharged LN with water and ethanol.

#### Acknowledgements

This research was supported by National Science Foundation of China (grant No. 20733001, 91027029). The Fundamental Research Funds for the Central Universities and the Research Funds of Renmin University of China (grant No.10XNI005).
